# Supplementary material
Source: MDPI journal article supplement (https://www.mdpi.com/2071-1050/10/12/4683)
Supplement: s1 [file s1]

## Supplementary information

**Table S1.** Soil sieving analysis of the sampling sites. (There are three replicas per site, which were sieved separately and then the mean value of the three replicas is reported here).

| Sampling Site | >45µm | 63µm | 125µm | 250µm | 500µm | 1mm | 2mm | 4mm | >4mm |
|---------------|-------|------|-------|-------|-------|-----|-----|-----|------|
| S1            | 4%    | 9%   | 17%   | 29%   | 46%   | 62% | 78% | 90% | 10%  |
| S2            | 3%    | 8%   | 17%   | 31%   | 46%   | 60% | 72% | 81% | 19%  |
| S3            | 3%    | 7%   | 13%   | 23%   | 34%   | 45% | 56% | 71% | 29%  |
| S4            | 0%    | 0%   | 3%    | 7%    | 27%   | 39% | 48% | 73% | 27%  |
| S5            | 4%    | 14%  | 25%   | 44%   | 60%   | 69% | 78% | 88% | 12%  |
| S6            | 4%    | 8%   | 14%   | 25%   | 40%   | 54% | 68% | 80% | 20%  |
| S7            | 6%    | 13%  | 24%   | 43%   | 64%   | 75% | 84% | 89% | 11%  |
| S8            | 4%    | 8%   | 17%   | 41%   | 63%   | 78% | 83% | 90% | 10%  |
| S9            | 0%    | 3%   | 11%   | 29%   | 51%   | 68% | 77% | 84% | 16%  |
| S10           | 2%    | 6%   | 12%   | 23%   | 54%   | 79% | 86% | 93% | 7%   |
| S11           | 1%    | 7%   | 17%   | 36%   | 57%   | 74% | 81% | 89% | 11%  |
| S12           | 2%    | 5%   | 12%   | 22%   | 37%   | 56% | 74% | 89% | 11%  |
| S13           | 1%    | 3%   | 11%   | 18%   | 32%   | 47% | 62% | 80% | 20%  |
| S14           | 3%    | 9%   | 21%   | 40%   | 61%   | 76% | 85% | 91% | 9%   |
| S15           | 1%    | 8%   | 20%   | 35%   | 53%   | 70% | 89% | 82% | 18%  |
| S16           | 3%    | 7%   | 14%   | 26%   | 45%   | 61% | 76% | 76% | 24%  |
